# Supplementary material
Source: Royal Society of Chemistry journal article supplement (doi:10.1039/d6lc00037a)
Supplement: d6lc00037a1.pdf [file d6lc00037a1.pdf]

1 **Supplementary File**

2

3 **A Dual-Antibody Gold Nanoparticle Based Lateral Flow Assay for Rapid and Selective**  
4 **Detection of Mesenchymal Stem Cell Stemness**

5 Drishya Prakashan<sup>a,b</sup>, C A Amarnath<sup>c</sup>, Shilpa N Sawant<sup>c</sup>, G Taru Sharma<sup>a,b,d</sup>, Sonu Gandhi<sup>a,b#</sup>

6 <sup>a</sup>BRIC-National Institute of Animal Biotechnology (NIAB), Hyderabad-500032, Telangana,  
7 India.

8 <sup>b</sup>BRIC-Regional Centre for Biotechnology (RCB), Faridabad-121001, Haryana, India.

9 <sup>c</sup>Bhabha Atomic Research Centre (BARC), Trombay, Mumbai - 400085 India

10 <sup>d</sup>ICAR-Indian Veterinary Research Institute, Izatnagar-243122, UP., India

11

12 **Supplementary Figure 1**

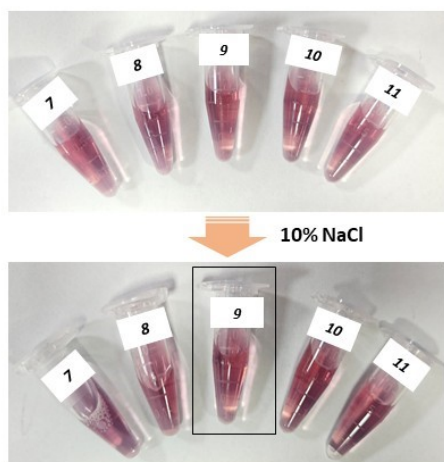

13

14 *Supplementary Figure 1: Salt-induced aggregation assay for optimization of pH during*  
15 *antibody conjugation to AuNPs. AuNPs suspensions were adjusted to different pH values (7–*  
16 *11) and incubated with antibody, followed by the addition of 10% NaCl to induce aggregation.*  
17 *Visual color changes indicated nanoparticle stability, where retention of the characteristic red*  
18 *color reflected successful antibody adsorption and colloidal stabilization, while purple/blue*  
19 *discoloration denoted salt-induced aggregation due to insufficient surface coverage. Among*  
20 *the tested conditions, pH 9 exhibited maximal resistance to aggregation, suggested optimal*  
21 *conjugation efficiency.*

22

23 **Supplementary Figure 2**

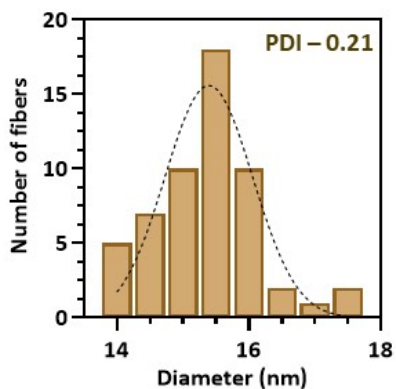

24

25 *Supplementary Figure 2: Size distribution histogram of synthesized nanoparticles obtained*  
26 *from TEM analysis. The particles exhibit a narrow diameter distribution centered around ~15*  
27 *nm with a polydispersity index (PDI) of 0.21.*

28

29 **Supplementary Figure 3**

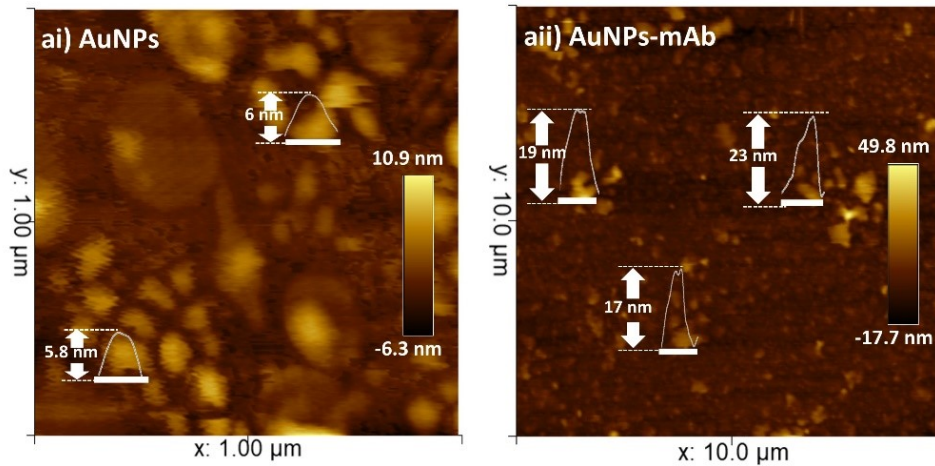

30

31 *Supplementary Figure 3: AFM height profiles of ai. AuNPs showing low surface roughness and*  
32 *particle heights of 5.8–6.0 nm, maxima ~10.9 nm, and aii. AuNPs-mAbs demonstrating*  
33 *increased surface height (17–23 nm, maxima ~49.8 nm) and roughness due to antibody layers.*

34

35 **Supplementary Figure 4**

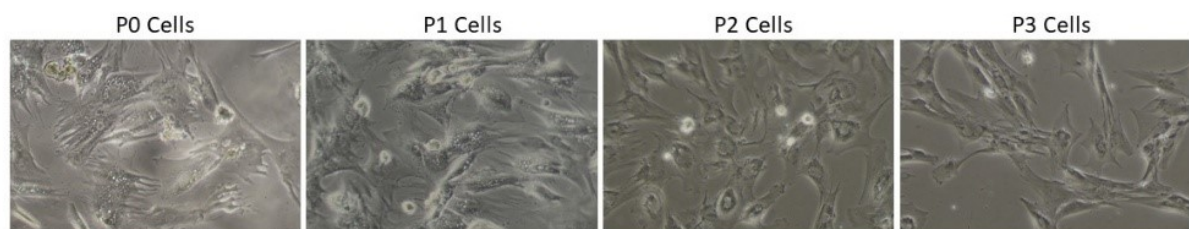

36

37 *Supplementary Figure 4: Representative microscopic images of MSCs after each passage from*  
38 *P0 to P3 demonstrated consistent cell morphology across multiple passages.*

39
